# Supplementary material for: Core–shell Si-doped NiFe LDH/C electrocatalyst for the methanol oxidation reaction
Source: Royal Society of Chemistry journal article supplement (doi:10.1039/d5nj03677a), 2025-01-01
Supplement: d5nj03677a1.pdf [file d5nj03677a1.pdf]

## Supporting Information

### **Core-shell Si doped NiFe LDH/C electrocatalyst for methanol oxidation reaction**

Yuanhao Li<sup>#</sup>, Siwei Wang<sup>#</sup>, Haonan Li, Qijing Bu<sup>\*</sup>, Huijuan Li<sup>\*</sup>, and Qingyun Liu<sup>\*</sup>

*College of Chemical and Environmental Engineering, Shandong University of Science and Technology, Qingdao 266590, China*

<sup>#</sup>These authors contributed equally to this work

## **Electrochemical test methods**

### **1 Preparation of working electrode**

Prior to use, the glassy carbon electrode surface was sequentially polished with alumina polishing powders, ultrasonically treated in a mixed solution of deionized water and ethanol for 10 minutes. The working electrode was prepared as follows: 4 mg of catalyst, 480  $\mu\text{L}$  of deionized water and 500  $\mu\text{L}$  of anhydrous ethanol, and 20  $\mu\text{L}$  of Nafion solution (5 wt%) were mixed. The mixture was then subjected to ultrasonic dispersion for 30 minutes to ensure homogeneity. Subsequently, 3  $\mu\text{L}$  of the uniformly dispersed catalyst ink was precisely deposited onto the pre-polished glassy carbon electrode (GCE). Finally, the coated electrode was air-dried at room temperature to form the working electrode, which was directly employed for the subsequent electrochemical testing.

### **2 Electrochemical testing**

All electrochemical tests were conducted using a CHI760E electrochemical workstation with a three-electrode system. The L-shaped glassy carbon electrode (GCE), Hg/HgO and a platinum sheet ( $10 \times 10 \times 0.1$  mm) were acted as the working electrode, the reference electrode and the counter electrode. The  $\text{N}_2$  saturated 1 M KOH + 1 M  $\text{CH}_3\text{OH}$  was used as electrolyte. All cyclic voltammetry (CV) and linear sweep voltammetry (LSV) measurements were carried out at the potential in the range from 0 V vs. SCE to 0.6 V vs. SCE with the scan rate of  $50 \text{ mV s}^{-1}$ . The tafel plots were derived from LSV data using the classical Tafel equation:  $\eta = b \log|j| + a$ , in which  $\eta$  represents the overpotential,  $j$  denotes the current density,  $b$  is the Tafel slope, and  $a$  is the

intercept. The electrochemical impedance spectroscopy (EIS) was performed at a constant potential of 0.55 V vs. SCE with the frequency range from 1 Hz to 100 kHz. The stability was characterized by the chronoamperometry test which is carried out at 0.55 V vs. SCE for 10 h. The electrochemical surface area (ECSA) is determined by CV curves at different scan rates of 10, 20, 30, 40, 50, 60, 70, 80, 90, 100 mV s<sup>-1</sup>. The potential range is typically a 0.1 V window centered at open-circuit potential (OCP) of the system. The double-layer charging current ( $i_c$ ) is equal to the product of the scan rate ( $v$ ) and the electrochemical double-layer capacitance according to the following equation:  $i_c = v \times C_{dl}$ . Therefore, the slope of the straight line derived from the  $i_c$  as a function of  $v$ , is equal to  $C_{dl}$ . The ECSA values are calculated according to the corresponding  $C_{dl}$  depending on the formula:  $ECSA = C_{dl}/C_s$ .

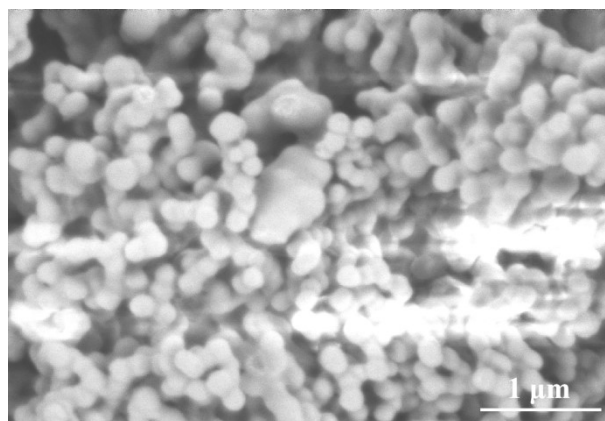

**Fig. S1** SEM image of carbon square.

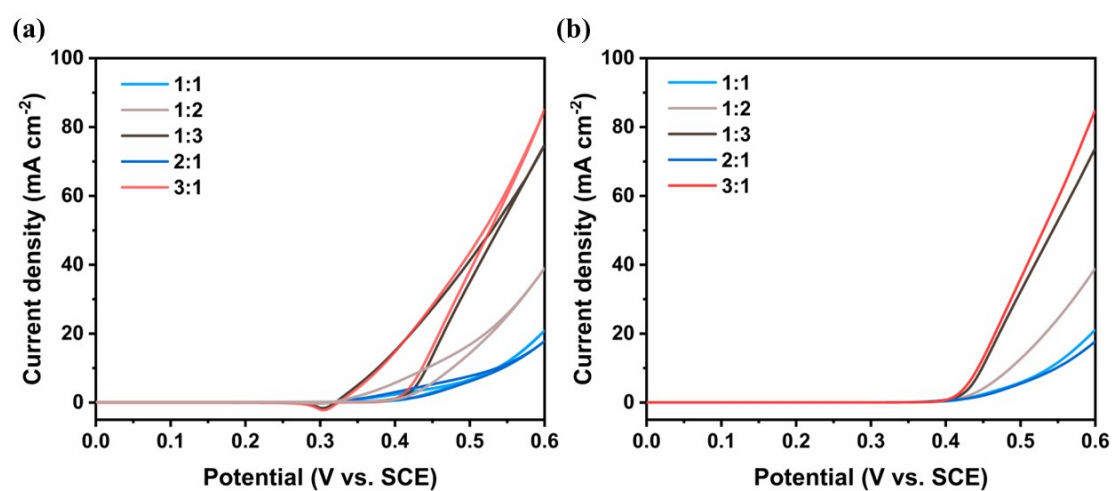

**Fig. S2** a) CV curves for NiFe-LDH/C. b) LSV curves for NiFe-LDH/C.

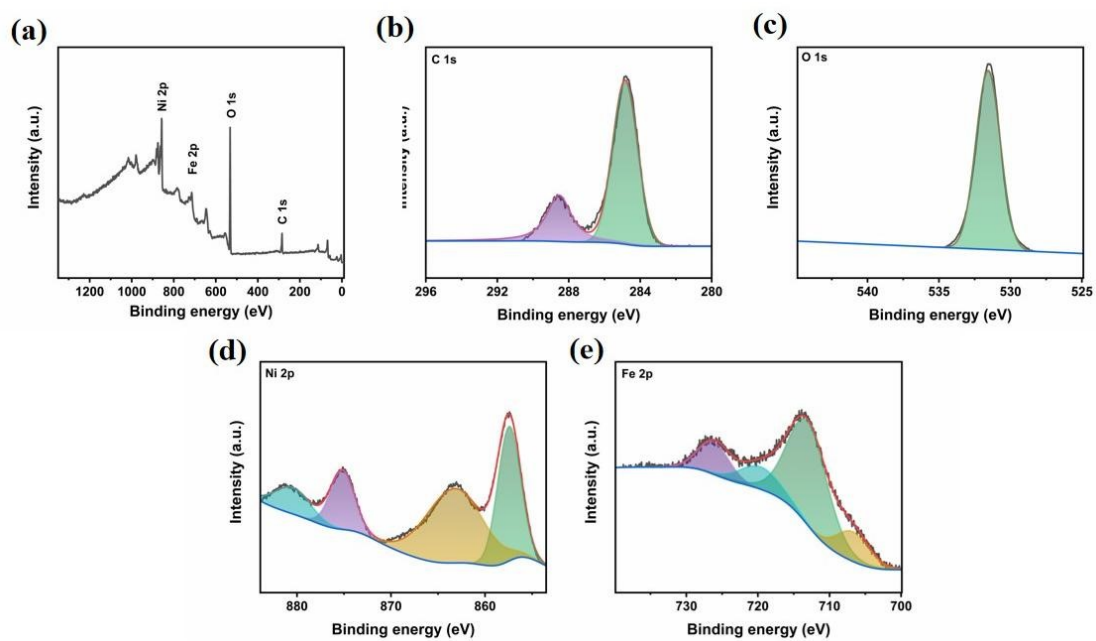

**Fig. S3** XPS spectra of NiFe-LDH/C: a) full spectrum, b) C 1s, c) O 1s, d) Ni 2p, e) Fe 2p high-

resolution spectra.

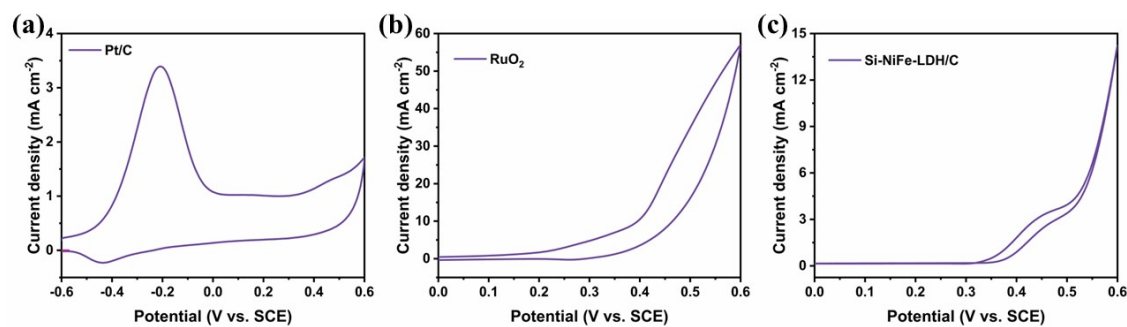

**Fig. S4** CV curves for commercial a) Pt/C and b) RuO<sub>2</sub> catalysts, c) CV curves of Si-NiFe-LDH/C synthesized by conventional methods.

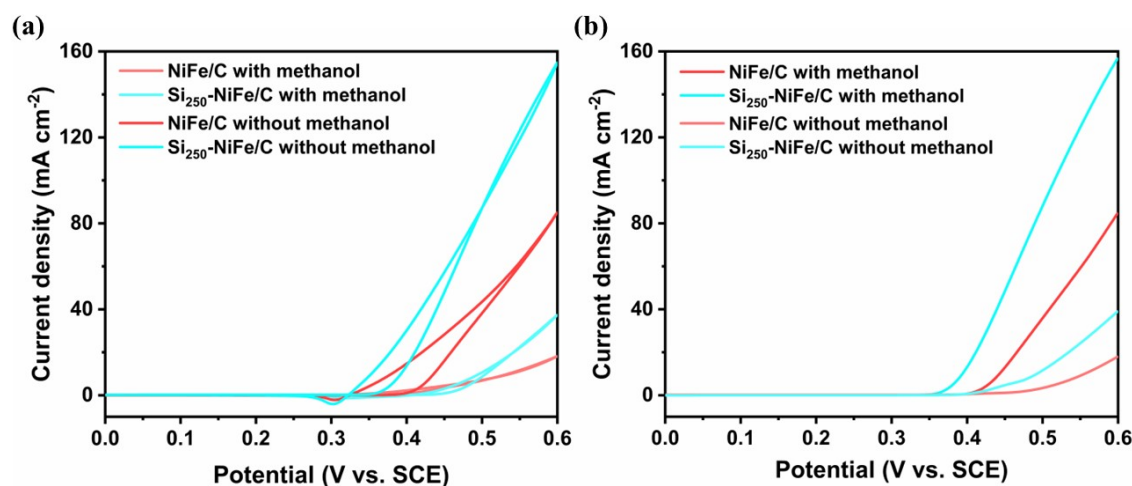

**Fig. S5** a) The CV curves and b) the LSV curves of NiFe-LDH/C and Si<sub>250</sub>-NiFe-LDH/C in 1 M KOH and 1 M KOH + 1M CH<sub>3</sub>OH.

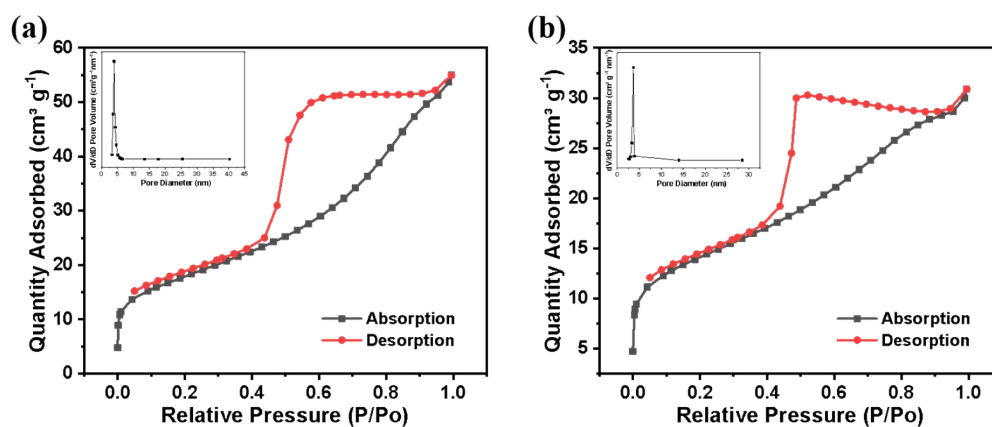

**Fig. S6** The N<sub>2</sub> adsorption–desorption isotherm curves and pore size distribution curves of a) NiFe-LDH/C and b) Si<sub>250</sub>-NiFe-LDH/C.

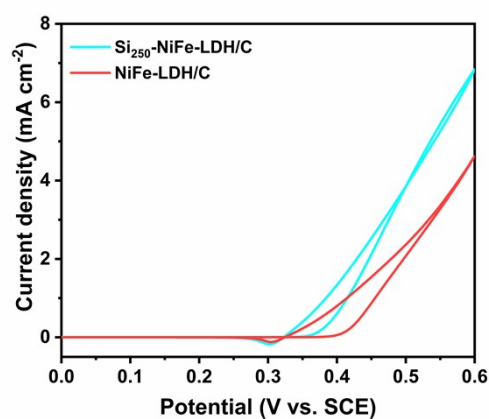

**Fig. S7** The intrinsic MOR performance of Si<sub>250</sub>-NiFe-LDH/C and NiFe-LDH/C.

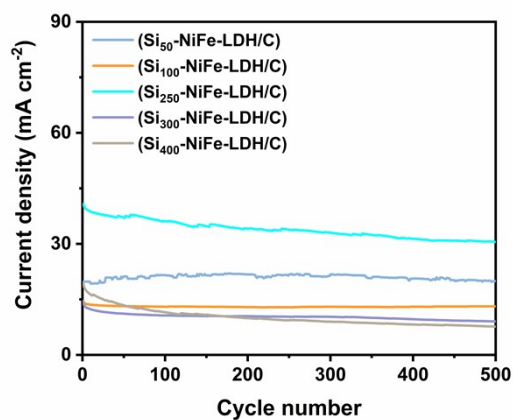

**Fig. S8** The cycling performance of the Si<sub>x</sub>-NiFe-LDH/C (Si<sub>50</sub>-NiFe-LDH/C, Si<sub>100</sub>-NiFe-LDH/C, Si<sub>250</sub>-NiFe-LDH/C, Si<sub>300</sub>-NiFe-LDH/C, and Si<sub>400</sub>-NiFe-LDH/C) in 1 M KOH + 1 M CH<sub>3</sub>OH for 500 cycles.

**Table S1** Atomic ratios of Si<sub>250</sub>-NiFe-LDH/C characterized by SEM-EDS.

| Element | Weight % | Atom % |
|---------|----------|--------|
| C       | 6.10     | 12.73  |
| O       | 40.65    | 63.64  |
| Si      | 1.37     | 1.22   |
| Fe      | 12.44    | 5.58   |
| Ni      | 39.44    | 16.83  |
| Total   | 100      | 100    |

**Table S2** Comparison of MOR performance of different catalysts.

| Catalyst                      | Performance              | Potential | Electrolyte          | Scan rate<br>(mV s <sup>-1</sup> ) | Reference |
|-------------------------------|--------------------------|-----------|----------------------|------------------------------------|-----------|
| Si <sub>250</sub> -NiFe-LDH/C | 154.77 mA                | 0.6 V vs. | 1 M KOH+1 M          | 50                                 | This work |
|                               | cm <sup>-2</sup>         | SCE       | CH <sub>3</sub> OH   |                                    |           |
| Si-NiFe-LDH/C                 | 14.22 mA                 | 0.6 V vs. | 1 M KOH+1 M          | 50                                 | This work |
|                               | cm <sup>-2</sup>         | SCE       | CH <sub>3</sub> OH   |                                    |           |
| Mn-NiFe-LDH/NF                | 148.9 mA                 | 1.6 V vs. | 1 M KOH+0.5          | 10                                 | [1]       |
|                               | cm <sup>-2</sup>         | RHE       | M CH <sub>3</sub> OH |                                    |           |
| Pt/NiFe-LDH                   | 18 mA cm <sup>-2</sup>   | 0.4 E vs. | 0.5 M KOH+1          | 50                                 | [2]       |
|                               |                          | RHE       | M CH <sub>3</sub> OH |                                    |           |
| NiFe-                         | 15.1 mA cm <sup>-2</sup> | 1.6 V vs. | 1 M KOH+0.5          | 100                                | [3]       |

|                                            |                           |                   |                                  |              |     |
|--------------------------------------------|---------------------------|-------------------|----------------------------------|--------------|-----|
| LDH/300MoCN                                |                           | RHE               | M CH <sub>3</sub> OH             |              |     |
| Ni-MOF/NiFe-LDH                            | 32.66 mA cm <sup>-2</sup> | 0.9 V vs. Hg/HgO  | 1 M KOH+1 M CH <sub>3</sub> OH   | 50           | [4] |
| NiFe-LDH/CX/NF                             | 400 mA cm <sup>-2</sup>   | 0.7 V vs. Ag/AgCl | 1 M KOH+0.5 M CH <sub>3</sub> OH | 10           | [5] |
| Cu(OH) <sub>2</sub> @FeNi(OH) <sub>x</sub> | 60 mA cm <sup>-2</sup>    | 1.34 V vs. RHE    | 1 M KOH+3 M CH <sub>3</sub> OH   | unidentified | [6] |
| Pt/Ni-Fe-LDH/RGO                           | 949.3 mA mg <sup>-1</sup> | unidentified      | 1 M KOH+1 M CH <sub>3</sub> OH   | 100          | [7] |

## Reference

- [1].Y. Ma, L. Li, Y. Zhang, et al. J. Colloid Interface Sci. 2024, 663, 971-980.
- [2].L. Li, Y. Yang, Y. Wang,et al. J. Mater. Res. Technol. 2020, 9 (3), 5463-5473.
- [3].Y. Du, Y. Zhang, X. Pu, et al. Chemosphere. 2023, 312, 137203.
- [4].W. Xia, G.Z. Guo, X.Q. Wu, et al. Solid State Chem. 2024, 336, 124783.
- [5].G.M. Abdelrazek, M.M. El-Deeb, A.A. Farghali,et al. Materials. 2021, 14 (18), 5271.
- [6].Y. Liang, Z. Song, Y. Zhang, et al. ACS Appl. Nano Mater. 2021, 4 (9), 8723-8732.
- [7].Z. Wang, F. Zhang, H. Zou, et al. J. Electroanal. Chem. 2018, 818, 198-203.
